# Supplementary material for: African origin haplotype protective for Alzheimer’s disease in APOEε4 carriers: exploring potential mechanisms
Source: PubMed Central journal article supplement — bioRxiv. 2024 Oct 27:2024.10.24.619909. Preprint. [Version 1] doi: 10.1101/2024.10.24.619909 (PMC11527192; doi:10.1101/2024.10.24.619909), 2024-10-27
Supplement: media-1.pdf [file media-1.pdf]

## Supplementary Tables and Figures

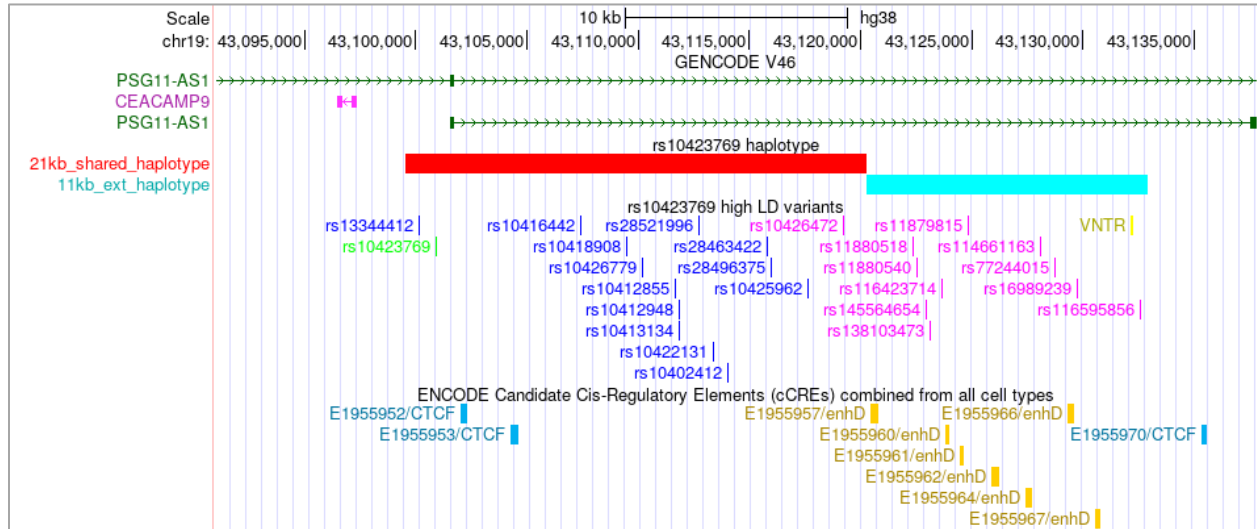

**Supplementary Figure 1.** UCSC browser view (hg38) of 21 kb minimum shared haplotype (in red) and the 11 kb extended haplotype (in light blue) and the ENCODE Registry of candidate cis-Regulatory Elements (release September 14, 2018). The protective allele rs10423769 is shown in green. SNPs with  $r^2 > 0.95$  with rs10423769\_A are shown in blue and SNPs with  $r^2 > 0.75$  with rs10423769\_A are shown in purple. Tandem repeat region (VNTR, chr19:43132126-43132260) is shown in yellow.

**Supplementary Table 1.** Tissue and rs10423769 genotype for 38 samples submitted to LRWGS

| <b>Sample number</b> | <b>Type</b> | <b>Research Center</b> | <b>rs10423769</b> |
|----------------------|-------------|------------------------|-------------------|
| sample1              | brain       | UM/BEB                 | A/G               |
| sample2              | brain       | UM/BEB                 | A/G               |
| sample3              | brain       | UM/BEB                 | A/G               |
| sample4              | brain       | UM/BEB                 | A/G               |
| sample5              | brain       | Emory                  | A/G               |
| sample6              | blood       | UM                     | A/A               |
| sample7              | blood       | UM                     | A/A               |
| sample8              | blood       | UM                     | A/A               |
| sample9              | blood       | UM                     | A/A               |
| sample10             | blood       | UM                     | A/G               |
| sample11             | blood       | UM                     | A/G               |
| sample12             | blood       | UM                     | A/G               |
| sample13             | blood       | UM                     | A/G               |
| sample14             | blood       | UM                     | A/G               |
| sample15             | blood       | UM                     | A/G               |
| sample16             | blood       | UM                     | A/G               |
| sample17             | blood       | UM                     | A/G               |
| sample18             | blood       | UM                     | G/G               |
| sample19             | blood       | UM                     | G/G               |
| sample20             | blood       | UM                     | G/G               |
| sample21             | blood       | UM                     | G/G               |
| sample22             | blood       | UM                     | G/G               |
| sample23             | blood       | UM                     | G/G               |
| sample24             | blood       | UM                     | G/G               |
| sample25             | blood       | UM                     | G/G               |
| sample26             | blood       | UM                     | G/G               |
| sample27             | blood       | UM                     | G/G               |
| sample28             | blood       | UM                     | G/G               |
| sample29             | blood       | UM                     | G/G               |
| sample30             | blood       | UM                     | G/G               |
| sample31             | blood       | UM                     | G/G               |
| sample32             | blood       | UM                     | G/G               |
| sample33             | blood       | UM                     | G/G               |
| sample34             | blood       | UM                     | G/G               |
| sample35             | blood       | UM                     | G/G               |
| sample36             | blood       | UM                     | G/G               |
| sample37             | blood       | UM                     | G/G               |
| sample38             | blood       | UM                     | G/G               |

Abbreviations: UM/BEB, University of Miami's Brain Endowment Bank; Emory, Emory University Goizueta Alzheimer's Disease Research Center Brain Bank; UM, University of Miami

**Supplementary Table 2.** Linkage disequilibrium analysis showing variants with  $r^2 > 0.75$  with rs10423769 in ADSP 36k Release and the frequency in 38 samples using LRWGS.

| CHR       | Position        | rs_id             | $r^2$ in ADSP 36k | Frequency in LRWGS (n=38) |
|-----------|-----------------|-------------------|-------------------|---------------------------|
| 19        | 43100141        | rs13344412        | 0.985596          | 0.282                     |
| <b>19</b> | <b>43100929</b> | <b>rs10423769</b> | <b>1</b>          | <b>0.269</b>              |
| 19        | 43107376        | rs10416442        | 0.994283          | 0.256                     |
| 19        | 43109437        | rs10418908        | 0.996912          | 0.269                     |
| 19        | 43110194        | rs10426779        | 0.996914          | 0.269                     |
| 19        | 43111648        | rs10412855        | 0.997354          | 0.269                     |
| 19        | 43111823        | rs10412948        | 0.987293          | 0.269                     |
| 19        | 43111824        | rs10413134        | 0.989898          | 0.269                     |
| 19        | 43112698        | rs28521996        | 0.994283          | 0.269                     |
| 19        | 43113370        | rs10422131        | 0.993395          | 0.269                     |
| 19        | 43113989        | rs10402412        | 0.997354          | 0.269                     |
| 19        | 43115785        | rs28463422        | 0.954943          | 0.269                     |
| 19        | 43115960        | rs28496375        | 0.989493          | 0.269                     |
| 19        | 43117612        | rs10425962        | 0.994283          | 0.269                     |
| 19        | 43119195        | rs10426472        | 0.797423          | 0.269                     |
| 19        | 43122350        | rs11880518        | 0.795646          | 0.231                     |
| 19        | 43122490        | rs11880540        | 0.797494          | 0.231                     |
| 19        | 43122910        | rs145564654       | 0.787618          | 0.231                     |
| 19        | 43123128        | rs138103473       | 0.793468          | 0.231                     |
| 19        | 43123613        | rs116423714       | 0.796079          | 0.231                     |
| 19        | 43124823        | rs11879815        | 0.783752          | 0.231                     |
| 19        | 43128072        | rs114661163       | 0.784624          | 0.218                     |
| 19        | 43128687        | rs77244015        | 0.786836          | 0.231                     |
| 19        | 43129746        | rs16989239        | 0.784624          | 0.231                     |
| 19        | 43132544        | rs116595856       | 0.785961          | 0.231                     |
